# Supplementary material
Source: HighWire-hosted journal article supplement (https://bmjopen.bmj.com/content/14/7/e079173)
Supplement: inline-supplementary-material-2 [file inline-supplementary-material-2.pdf]

Supplementary Table 1 Schedule of data collection

|                                                  | Baseline | Randomisation<br>& intervention | Post-randomisation |   |   |   |    |        |   |    |    |    |
|--------------------------------------------------|----------|---------------------------------|--------------------|---|---|---|----|--------|---|----|----|----|
|                                                  |          |                                 | 2                  | 4 | 6 | 8 | 10 | 3      | 6 | 12 | 18 | 24 |
|                                                  |          |                                 | weeks              |   |   |   |    | months |   |    |    |    |
| Sociodemographic details                         | X        |                                 |                    |   |   |   |    |        |   |    |    |    |
| HADS                                             | X        |                                 |                    |   |   |   |    |        |   |    |    |    |
| Medical history including<br>pain location       | X        |                                 |                    |   |   |   |    |        |   |    |    |    |
| STarT Back tool                                  | X        |                                 |                    |   |   |   |    |        |   |    |    |    |
| NRS pain score                                   | X        |                                 | X                  | X | X | X | X  | X      | X | X  | X  | X  |
| EQ-5D-5L                                         | X        |                                 |                    |   | X |   |    | X      | X | X  | X  | X  |
| SF-12                                            | X        |                                 |                    |   |   |   |    | X      | X | X  | X  | X  |
| ODI                                              | X        |                                 |                    |   |   |   |    | X      | X | X  | X  | X  |
| WPAI                                             | X        |                                 |                    |   |   |   |    | X      | X | X  | X  | X  |
| Procedural data                                  |          | X                               |                    |   |   |   |    |        |   |    |    |    |
| Blinded re-intervention<br>offered               |          |                                 |                    |   |   |   |    | X      |   |    |    |    |
| Uptake of blinded re-<br>intervention            |          |                                 |                    |   |   |   |    | X      | X | X  | X  | X  |
| Satisfaction with<br>treatment outcome           |          |                                 |                    |   |   |   |    | X      | X | X  | X  | X  |
| Adverse events                                   |          |                                 | X                  |   | X |   |    | X      | X | X  | X  | X  |
| Resource and health<br>service use questionnaire |          |                                 |                    |   |   |   |    | X      | X | X  | X  | X  |
